# Supplementary material for: Toward more accurate prediction of caspase cleavage sites: a comprehensive review of current methods, tools and features
Source: PubMed Central journal article supplement — Brief Bioinform. 2018 May 31;20(5):1669–84. doi: 10.1093/bib/bby041 (PMC6917222; doi:10.1093/bib/bby041), 2018-05-31
Supplement: bby041_supp.pdf [file bby041_supp.pdf]

# Supplementary Information for “Analysis of the Effect of Degree Correlation on the Size of Minimum Dominating Sets in Complex Networks”

Yu Bao, Simone Marini, Takeyuki Tamura, Mayumi Kamada, Shingo Maegawa, Hiroshi Hosokawa, Jiangning Song, Tatsuya Akutsu

## Protein Expression in Caspase Cleavage Assay

Both glutathione S transferase (GST) sequence and 5x myc tagged EGFP sequence were subcloned into pT7IRESmyc (pT7GSTmycEGFP). The DNA sequences corresponding to candidate caspase target peptide sequences were hybridized and subcloned into pT7GSTmycEGFP. The fusion protein, containing candidate caspase target sequence, was made by using with human cell-free protein expression system (Clontech) according to manufactures instruction. Primer pairs used in this study are as follows:

### DEVD:

GGGGCCCCTGGGATCCGACGAGGTGGACGGATCCCATCGATTTA  
CCCCGGGGACCCTAGGCTGCTCCACCTGCCTAGGGTAGCTAAAT

### IETD:

GGGGCCCCTGGGATCCATCGAGACCGACGGATCCCATCGATTTA  
CCCCGGGGACCCTAGGTAGCTCTGGCTGCCTAGGGTAGCTAAAT

### DSVDGSLT:

GGGGCCCCTGGGATCCGACAGCGTCGACGGCAGCCTGACCGGATCCCATCGATTT  
CCCCGGGGACCCTAGGCTGTGCGAGCTGCCGTCGGACTGGCCTAGGGTAGCTAAAT

**EEVDGAPR:**

GGGGCCCCTGGGATCCGAGGAGGTGGACGGCGCTCCTCGGGGATCCCATCGATTTA  
CCCCGGGGACCCTAGGCTCCTCCACCTGCCGCGAGGAGCCCCTAGGGTAGCTAAAT

**DVVDGADT:**

GGGGCCCCTGGGATCCGACGTGGTGGACGGCGCCGACACCCGGATCCCATCGATTTA  
CCCCGGGGACCCTAGGCTGCACCACCTGCCGCGGCTGTGGCCTAGGGTAGCTAAAT

**EEVDGSSP:**

GGGGCCCCTGGGATCCGAGGAGGTGGACGGCAGCAGCCCCGGATCCCATCGATTTA  
:CCCCGGGGACCCTAGGCTCCTCCACCTGCCGTCGTCCGGGCTAGGGTAGCTAAAT

**EEVDSGQG:**

GGGGCCCCTGGGATCCGAGGAGGTGGACGGCAGCCAGGGCGGATCCCATCGATTTA  
CCCCGGGGACCCTAGGCTCCTCCACCTGCCGTCGGTCCCGCCTAGGGTAGCTAAAT

**EETDGLDP:**

GGGGCCCCTGGGATCCGAGGAGACCGACGGCCTGGACCCCGGATCCCATCGATTTA  
CCCCGGGGACCCTAGGCTCCTCTGGCTGCCGGACCTGGGGCCTAGGGTAGCTAAAT

**EETDGLHE:**

GGGGCCCCTGGGATCCGAGGAGACCGACGGCCTGCACGAGGGATCCCATCGATTTA  
CCCCGGGGACCCTAGGCTCCTCTGGCTGCCGGACGTGCTCCCTAGGGTAGCTAAAT

**EEPDSANS:**

GGGGCCCCTGGGATCCGAGGAGCCCGACAGCGCCAACAGCGGATCCCATCGATTTA  
CCCCGGGGACCCTAGGCTCCTCGGGCTGTCCGGTTGTCCCTAGGGTAGCTAAAT

**AEVDGATP:**

GGGGCCCCTGGGATCCGCCGAGGTGGACGGCGCCACCCCTGGATCCCATCGATTTA  
CCCCGGGGACCCTAGGCGGCTCCACCTGCCGCGGTGGGGACCTAGGGTAGCTAAAT

**SEVDGNDS:**

GGGGCCCCTGGGATCCAGCGAGGTGGACGGCAACGACAGCGGATCCCATCGATTTA  
CCCCGGGGACCCTAGGTCGCTCCACCTGCCGTTGCTGTCGCCTAGGGTAGCTAAAT

**EEP DGGFR:**

GGGGCCCCTGGGATCCGAGGAGCCCGACGGCGGCTTCCGGGGATCCCATCGATTTA  
CCCCGGGGACCCTAGGCTCCTCGGGCTGCCGCCGAAGGCCCTAGGGTAGCTAAAT

**DDPDSAYL:**

GGGGCCCCTGGGATCCGACGACCCTGACAGCGCCTACCTGGGATCCCATCGATTTA  
CCCCGGGGACCCTAGGCTGCTGGGACTGTCGCGGATGGACCCTAGGGTAGCTAAAT

**NEVDGSNE:**

GGGGCCCCTGGGATCCAACGAGGTGGACGGCAGCAACGAGGGATCCCATCGATTTA  
CCCCGGGGACCCTAGGTTGCTCCACCTGCCGTCGTTGCTCCCTAGGGTAGCTAAAT

**SEIDGLKG:**

GGGGCCCCTGGGATCCAGCGAGATCGACGGCCTGAAGGGCGGATCCCATCGATTTA  
CCCCGGGGACCCTAGGTCGCTCTAGCTGCCGGACTTCCCGCCTAGGGTAGCTAAAT

**GEVDGKAI:**

GGGGCCCCTGGGATCCGGCGAGGTGGACGGCAAGGCCATCGGATCCCATCGATTTA  
CCCCGGGGACCCTAGGCCGCTCCACCTGCCGTTCCGGTAGCCTAGGGTAGCTAAAT

**DDTDGLTP:**

GGGGCCCCTGGGATCCGACGACACCGACGGCCTGACCCCTGGATCCCATCGATTTA  
CCCCGGGGACCCTAGGCTGCTGTGGCTGCCGGACTGGGGACCTAGGGTAGCTAAAT

**LES DSESL:**

GGGGCCCCTGGGATCCCTGGAGAGCGACAGCGAGAGCCTGGGATCCCATCGATTTA  
CCCCGGGGACCCTAGGGACCTCTCGCTGTCGCTCTCGGACCCTAGGGTAGCTAAAT

**TEPDSPSP:**

GGGGCCCCTGGGATCCACCGAGCCCGACAGCCCCAGCCCCGGATCCCATCGATTTA  
CCCCGGGGACCCTAGGTGGCTCGGGCTGTCGGGGTCGGGGCCTAGGGTAGCTAAAT

**AEVDGVDE:**

GGGGCCCCTGGGATCCGCCGAGGTGGACGGCGTGGACGAGGGATCCCATCGATTTA  
CCCCGGGGACCCTAGGCGGCTCCACCTGCCGCACCTGCTCCCTAGGGTAGCTAAAT

**DETDSGAG:**

GGGGCCCCTGGGATCCGACGAGACCGACAGCGGGCGCCGGCGGATCCCATCGATTTA  
CCCCGGGGACCCTAGGCTGCTCTGGCTGTCGCCGCGGCCGCCTAGGGTAGCTAAAT

**TEMDSETL:**

GGGGCCCCTGGGATCCACCGAGATGGACAGCGAGACCCTGGGATCCCATCGATTTA  
CCCCGGGGACCCTAGGTGGCTCTACCTGTCGCTCTGGGACCCTAGGGTAGCTAAAT

**LEMDSVLK:**

GGGGCCCCTGGGATCCCTGGAGATGGACAGCGTGCTGAAGGGATCCCATCGATTTA  
CCCCGGGGACCCTAGGGACCTCTACCTGTCGCACGACTTCCCTAGGGTAGCTAAAT

**TETDSVGT:**

GGGGCCCCTGGGATCCACCGAGACCGACAGCGTGGGCACCGGATCCCATCGATTTA  
CCCCGGGGACCCTAGGTGGCTCTGGCTGACGCACCCGTGGCCTAGGGTAGCTAAAT

**TEEDSVSV:**

GGGGCCCCTGGGATCCACCGAGGAGGACAGCGTGAGCGTGGGATCCCATCGATTTA  
CCCCGGGGACCCTAGGTGGCTCCTCCTGTCGCACTCGCACCCCTAGGGTAGCTAAAT

**DETDSPTV:**

GGGGCCCCTGGGATCCGACGAGACCGACAGCCCTACCGTGGGATCCCATCGATTTA  
CCCCGGGGACCCTAGGCTGCTCTGGCTGTCGGGATGGCACCCCTAGGGTAGCTAAAT

**DEVGDAND:**

GGGGCCCCTGGGATCCGACGAGGTGGACGGCGCCAACGACGGATCCCATCGATTTA  
CCCCGGGGACCCTAGGCTGCTCCACCTGCCGCGGTTGCTGCCTAGGTTAGCTAAAT
